# Supplementary material
Source: PubMed Central journal article supplement (PMC3681897)
Supplement: NIHMS457584-supplement-1.pdf [file NIHMS457584-supplement-1.pdf]

**Supplementary Table 1.** List of antibodies used in study.

| Antigen (Abbreviation)        | Concentration (µg/ml) | Catalog# (Ref) | Species | Source            | Frozen                   | Formalin                 | Retrieval Citrate        |
|-------------------------------|-----------------------|----------------|---------|-------------------|--------------------------|--------------------------|--------------------------|
| α-Smooth Muscle Actin (α-SMA) | 5                     | RB-9010-P      | Rabbit  | NeoMarkers        |                          | <input type="checkbox"/> | <input type="checkbox"/> |
| CD31                          | 5                     | DIA310         | Rat     | Dianova           | <input type="checkbox"/> | <input type="checkbox"/> | <input type="checkbox"/> |
| Cleaved Caspase 3             | 5                     | 96645          | Rabbit  | Cell Signaling    |                          | <input type="checkbox"/> | <input type="checkbox"/> |
| E-Cadherin (E-Cad)            |                       | SC7870         | Rabbit  | Santa Cruz        |                          | <input type="checkbox"/> | <input type="checkbox"/> |
| Endomucin                     | 5                     | SC65495        | Rat     | Santa Cruz        | <input type="checkbox"/> | <input type="checkbox"/> | <input type="checkbox"/> |
| Meca-32                       |                       | N/A            | Rat     | Purified in house | <input type="checkbox"/> | <input type="checkbox"/> | <input type="checkbox"/> |
| NG2 chondroitin sulfate (NG2) | 5                     | AB4320         | Rabbit  | Abcam             |                          |                          |                          |
| Pimonidazole-FITC mab (Pim)   | 5                     |                | Rabbit  | Chemicon          | <input type="checkbox"/> |                          |                          |
| Phospho-HistoneH3 Ser10 (pH3) | 5                     | 06570          | Rabbit  | Millipore         |                          | <input type="checkbox"/> | <input type="checkbox"/> |
| S100A4                        | 5                     | AB27957        | Rabbit  | Abcam             |                          | <input type="checkbox"/> | <input type="checkbox"/> |
| Vimentin (Vim)                |                       | 2105VIM        | Chicken | Phospho Solutions |                          | <input type="checkbox"/> | <input type="checkbox"/> |
| Zeb1                          | 5                     |                | Rabbit  |                   |                          | <input type="checkbox"/> | <input type="checkbox"/> |
