# Supplementary material
Source: PubMed Central journal article supplement (PMC3681897)
Supplement: NIHMS457584-supplement-2.pdf [file NIHMS457584-supplement-2.pdf]

Supplementary Table 2A.

| Cell line     | IC <sub>50</sub> |           |           |                 |                 | Fold reduction |
|---------------|------------------|-----------|-----------|-----------------|-----------------|----------------|
|               | Gem (nM)         | Cis (nM)  | BIBF (μM) | Gem + BIBF (nM) | Cis + BIBF (nM) |                |
| <b>A549</b>   | 4.85±0.15        | 0.33±0.01 | >20       | 5.27±0.23       | 0.36±0.01       | <b>0.92</b>    |
| <b>Calu-6</b> | 9.76±0.32        | 0.68±0.02 | >20       | 17.2±0.52       | 1.20±0.03       | <b>0.56</b>    |
| <b>Calu-3</b> | 5.07±0.03        | 0.68±0.28 | >20       | 8.54±2.81       | 0.59±0.19       | <b>0.68</b>    |
| <b>H1703</b>  | 4.34±0.53        | 0.30±0.03 | 0.05      | <0.12           | <0.008          | <b>&gt;100</b> |
| <b>H1993</b>  | 8.89±0.41        | 0.62±0.02 | >20       | 7.7±0.39        | 0.54±0.02       | <b>1.14</b>    |

Supplementary Table 2B.

| Cell line         | IC <sub>50</sub> |           |                 | Fold Reduction |
|-------------------|------------------|-----------|-----------------|----------------|
|                   | Gem (nM)         | BIBF (μM) | Gem + BIBF (nM) |                |
| <b>HPAF-II</b>    | >2000            | >20       | 492.12±36.12    | <b>4.06</b>    |
| <b>Colo357</b>    | 1.27±0.03        | >20       | 5.80±0.14       | <b>0.21</b>    |
| <b>AsPC-1</b>     | 24.13±3.90       | >20       | 24.85±4.02      | <b>0.97</b>    |
| <b>MIA PaCa-2</b> | 8.55±0.49        | >20       | 7.01±0.18       | <b>1.21</b>    |

**Supplementary Table 2. BIBF 1120 does not show anti-proliferative effects at a pharmacologically achievable dose or sensitize tumors cells to chemotherapy *in vitro*.** Cell growth assays were performed in 96-well format for a 5-day duration on selected lung (**A**) and pancreatic (**B**) cancer cell lines. Cells were plated on day 0, drugs were added in eight serial four-fold dilutions on day 1. The highest concentration of Gemcitabine and Cisplatin were 2,000 nmol/L and 140 nmol/L respectively. For lung studies, Gemcitabine and Cisplatin were co-diluted. The highest concentration for BIBF 1120 was 25.6 μmol/L. For combination studies, a constant concentration of (225 nmol/L) BIBF 1120 was added to serial dilutions of Gemcitabine and/or Cisplatin. On day 5, cells were incubated in 333 μg/ml MTS reagent at 37°C for 1 hour and absorption was read at 490nm. IC<sub>50</sub> curves were calculated using in-house software. Fold changes were calculated by dividing the median IC<sub>50</sub> (n=4) for chemotherapeutics by the IC<sub>50</sub> (n=4) for each chemotherapeutic in combination with BIBF 1120. Definition of terms; Gem: Gemcitabine, Cis: Cisplatin, BIBF: BIBF 1120.
