# Supplementary material
Source: PubMed Central journal article supplement (PMC3681897)
Supplement: NIHMS457584-supplement-4.pdf [file NIHMS457584-supplement-4.pdf]

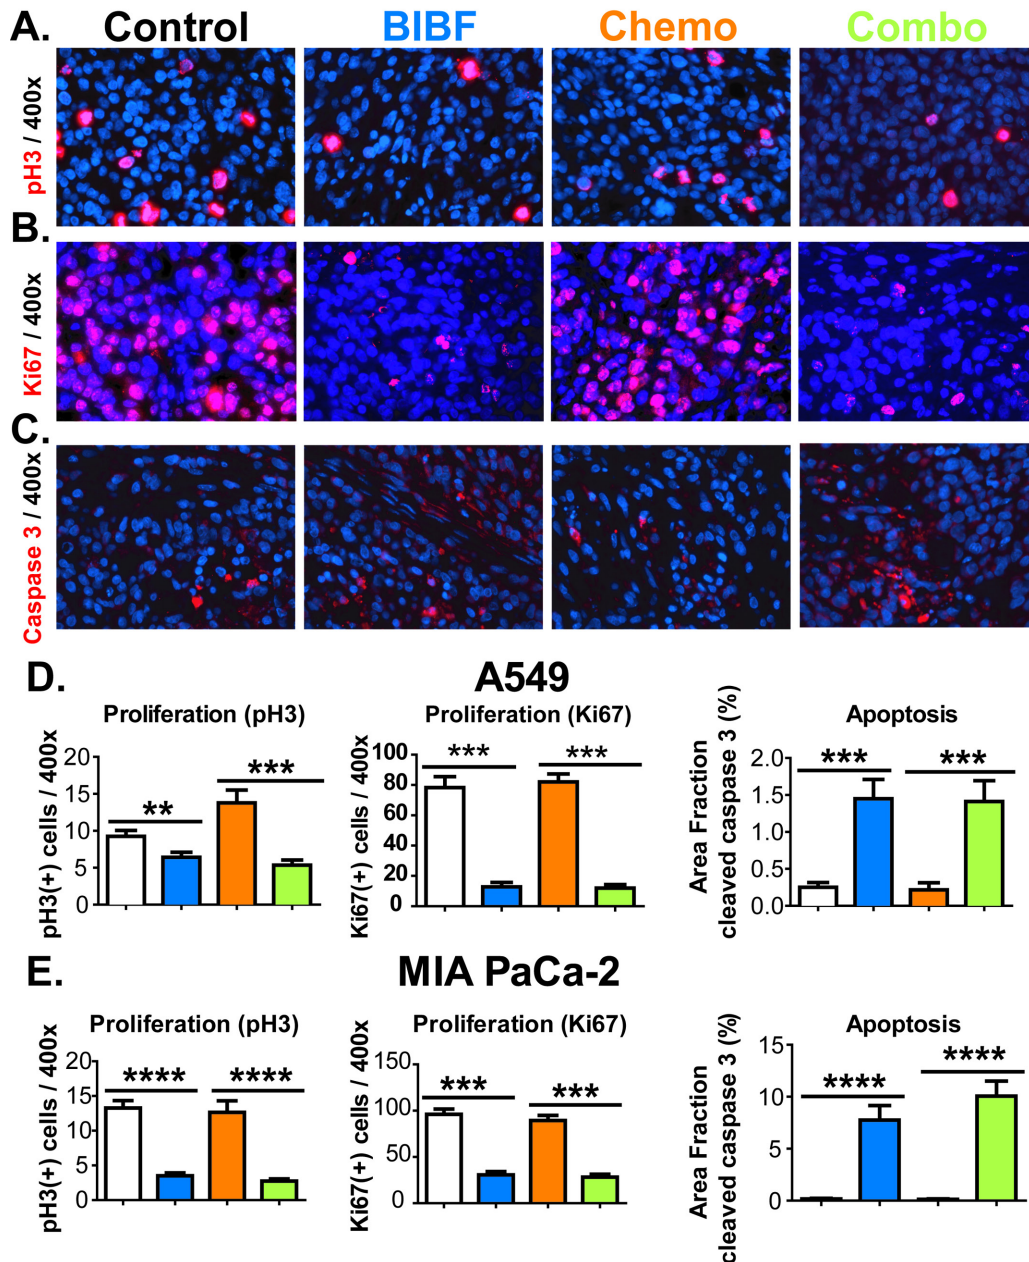

**Supplementary Figure 2. BIBF 1120 inhibits proliferation and promotes apoptosis in lung and pancreatic xenografts.** A-C) Representative images of phospho-histone H3 (pH3, **A**), Ki67 (**B**) and cleaved caspase-3 (**C**) immunoreactivity in A549 xenografts treated as indicated are shown. Total magnification, 400x. DAPI was used to label nuclei. D-E) Quantification of immunohistochemical analysis of pH3, Ki67 and cleaved caspase 3 in A549 (**D**) and MIA PaCa-2 (**E**) xenografts. Bar graphs indicate means +/- SEM. A minimum of 5 images were acquired per group and assessed via Nikon Elements software. \* $p < 0.05$ , \*\* $p < 0.01$ , \*\*\* $p < 0.001$ , \*\*\*\* $p < 0.0001$  by Dunn's post-test.
